# Supplementary material for: Land-surface forcing and anthropogenic heat modulate ozone by meteorology: A perspective from the Yangtze River Delta region
Source: Copernicus journal article supplement (doi:10.5194/acp-2021-619), 2021-08-17
Supplement: Supplementary file 1 [file acp-2021-619-supplement.pdf]

The supporting information is composed of all regional O<sub>3</sub> pollution episodes and the corresponding weather patterns from 2015 to 2019 (Table S1), the typical weather charts (under high pressure and uniform pressure field) during the O<sub>3</sub> pollution episode in this study (Figure S1) and the original plots for USGS\_noAH (Figure S2 and 3) and MODIS\_withAH (Figure S4 and 5) simulations.

**Table S1.** Regional O<sub>3</sub> pollution episodes and the corresponding weather patterns in the YRD.

| Year | Date        | Number of polluted cities | Weather pattern                       |
|------|-------------|---------------------------|---------------------------------------|
| 2015 | April 25    | 13                        | Under high pressure                   |
|      | April 26    | 13                        | Under high pressure                   |
|      | May 7       | 13                        | Uniform pressure field                |
|      | May 25      | 13                        | Under high pressure                   |
|      | June 5      | 13                        | Anterior part of high pressure ridge  |
|      | June 6      | 16                        | Uniform pressure field                |
|      | July 2      | 15                        | Uniform pressure field                |
|      | July 14     | 15                        | With typhoon activity                 |
|      | August 5    | 14                        | With typhoon activity                 |
|      | August 27   | 13                        | Uniform pressure field                |
|      | August 28   | 15                        | Uniform pressure field                |
|      | August 29   | 13                        | Uniform pressure field                |
|      | September 1 | 14                        | Uniform pressure field                |
|      | September 2 | 13                        | Uniform pressure field                |
|      | September 3 | 15                        | Under high pressure                   |
|      | September 4 | 16                        | Under high pressure                   |
|      | October 13  | 15                        | Under high pressure                   |
|      | October 14  | 13                        | With typhoon activity                 |
|      | October 15  | 13                        | With typhoon activity                 |
|      | October 16  | 14                        | With typhoon activity                 |
| 2016 | April 29    | 19                        | Under high pressure                   |
|      | May 11      | 13                        | Under high pressure                   |
|      | May 12      | 13                        | Anterior part of high pressure ridge  |
|      | May 17      | 13                        | Under high pressure                   |
|      | May 19      | 13                        | Posterior part of high pressure ridge |

|      |             |    |                                       |
|------|-------------|----|---------------------------------------|
|      | June 17     | 13 | Posterior part of high pressure ridge |
|      | July 24     | 13 | Uniform pressure field                |
|      | July 25     | 14 | Uniform pressure field                |
|      | July 28     | 16 | Uniform pressure field                |
|      | July 29     | 15 | Uniform pressure field                |
|      | August 19   | 13 | With typhoon activity                 |
|      | August 25   | 17 | With typhoon activity                 |
|      | August 28   | 17 | With typhoon activity                 |
|      | August 31   | 20 | Under high pressure                   |
|      | September 1 | 13 | With typhoon activity                 |
|      | September 2 | 15 | With typhoon activity                 |
|      | September 3 | 19 | With typhoon activity                 |
|      | September 8 | 15 | Uniform pressure field                |
|      | September 9 | 18 | Under high pressure                   |
| 2017 | April 23    | 16 | Under high pressure                   |
|      | April 24    | 15 | Uniform pressure field                |
|      | April 28    | 19 | Anterior part of high pressure ridge  |
|      | April 29    | 21 | Under high pressure                   |
|      | April 30    | 18 | Uniform pressure field                |
|      | May 7       | 14 | Under high pressure                   |
|      | May 10      | 16 | Uniform pressure field                |
|      | May 14      | 18 | Under high pressure                   |
|      | May 17      | 17 | Under high pressure                   |
|      | May 18      | 17 | Under high pressure                   |
|      | May 19      | 14 | Uniform pressure field                |
|      | May 25      | 19 | Anterior part of high pressure ridge  |
|      | May 26      | 22 | Under high pressure                   |
|      | May 27      | 22 | Under high pressure                   |
|      | May 28      | 21 | Under high pressure                   |
|      | May 29      | 17 | Under high pressure                   |
|      | May 30      | 18 | Uniform pressure field                |
|      | May 31      | 16 | Uniform pressure field                |
|      | June 1      | 13 | Uniform pressure field                |
|      | June 2      | 18 | Under high pressure                   |
|      | June 3      | 15 | Uniform pressure field                |

|      |              |    |                                      |
|------|--------------|----|--------------------------------------|
|      | June 7       | 16 | Anterior part of high pressure ridge |
|      | June 8       | 22 | Under high pressure                  |
|      | June 9       | 18 | Under high pressure                  |
|      | June 16      | 15 | Under high pressure                  |
|      | June 17      | 14 | Uniform pressure field               |
|      | July 22      | 14 | With typhoon activity                |
|      | July 23      | 16 | With typhoon activity                |
|      | July 24      | 16 | With typhoon activity                |
|      | July 25      | 18 | With typhoon activity                |
|      | July 26      | 19 | With typhoon activity                |
|      | July 27      | 19 | With typhoon activity                |
|      | August 11    | 13 | Under high pressure                  |
|      | September 18 | 20 | With typhoon activity                |
| 2018 | April 1      | 13 | Uniform pressure field               |
|      | April 18     | 15 | Under high pressure                  |
|      | April 19     | 18 | Under high pressure                  |
|      | April 25     | 17 | Uniform pressure field               |
|      | April 26     | 13 | Uniform pressure field               |
|      | April 27     | 22 | Under high pressure                  |
|      | April 28     | 24 | Under high pressure                  |
|      | April 29     | 17 | Uniform pressure field               |
|      | May 4        | 20 | Under high pressure                  |
|      | May 11       | 14 | Under high pressure                  |
|      | May 13       | 13 | Uniform pressure field               |
|      | May 23       | 15 | Under high pressure                  |
|      | May 28       | 13 | Uniform pressure field               |
|      | June 1       | 20 | Under high pressure                  |
|      | June 3       | 13 | Uniform pressure field               |
|      | June 4       | 14 | Anterior part of high pressure ridge |
|      | June 6       | 16 | With typhoon activity                |
|      | June 7       | 13 | With typhoon activity                |
|      | June 11      | 20 | With typhoon activity                |
|      | June 12      | 22 | Under high pressure                  |
|      | June 13      | 18 | Uniform pressure field               |
|      | June 14      | 20 | Uniform pressure field               |

|      |              |    |                                      |
|------|--------------|----|--------------------------------------|
|      | June 15      | 15 | With typhoon activity                |
|      | July 28      | 18 | With typhoon activity                |
|      | August 10    | 15 | With typhoon activity                |
|      | August 11    | 14 | With typhoon activity                |
|      | September 5  | 21 | Uniform pressure field               |
|      | October 7    | 14 | Uniform pressure field               |
| 2019 | May 9        | 15 | Uniform pressure field               |
|      | May 10       | 17 | Uniform pressure field               |
|      | May 11       | 19 | Uniform pressure field               |
|      | May 12       | 16 | Uniform pressure field               |
|      | May 21       | 13 | Anterior part of high pressure ridge |
|      | May 22       | 17 | Uniform pressure field               |
|      | May 23       | 21 | Under high pressure                  |
|      | May 24       | 14 | Under high pressure                  |
|      | June 2       | 14 | Uniform pressure field               |
|      | June 3       | 14 | Uniform pressure field               |
|      | June 4       | 18 | Uniform pressure field               |
|      | June 5       | 15 | Under high pressure                  |
|      | June 8       | 15 | Anterior part of high pressure ridge |
|      | June 9       | 13 | Anterior part of high pressure ridge |
|      | June 10      | 13 | Anterior part of high pressure ridge |
|      | June 11      | 13 | Under high pressure                  |
|      | June 15      | 22 | Under high pressure                  |
|      | June 16      | 18 | Under high pressure                  |
|      | June 17      | 13 | Under high pressure                  |
|      | June 27      | 13 | With typhoon activity                |
|      | June 28      | 16 | With typhoon activity                |
|      | July 14      | 15 | Under high pressure                  |
|      | July 15      | 13 | Uniform pressure field               |
|      | August 16    | 18 | With typhoon activity                |
|      | August 17    | 17 | Uniform pressure field               |
|      | August 18    | 13 | Under high pressure                  |
|      | August 21    | 16 | Uniform pressure field               |
|      | September 8  | 18 | With typhoon activity                |
|      | September 24 | 20 | Under high pressure                  |



Note. The weather patterns are distinguished by the weather charts at 850 hPa from Korea Meteorological Administration (<http://web.kma.go.kr/chn/weather/images/analysischart.jsp>).

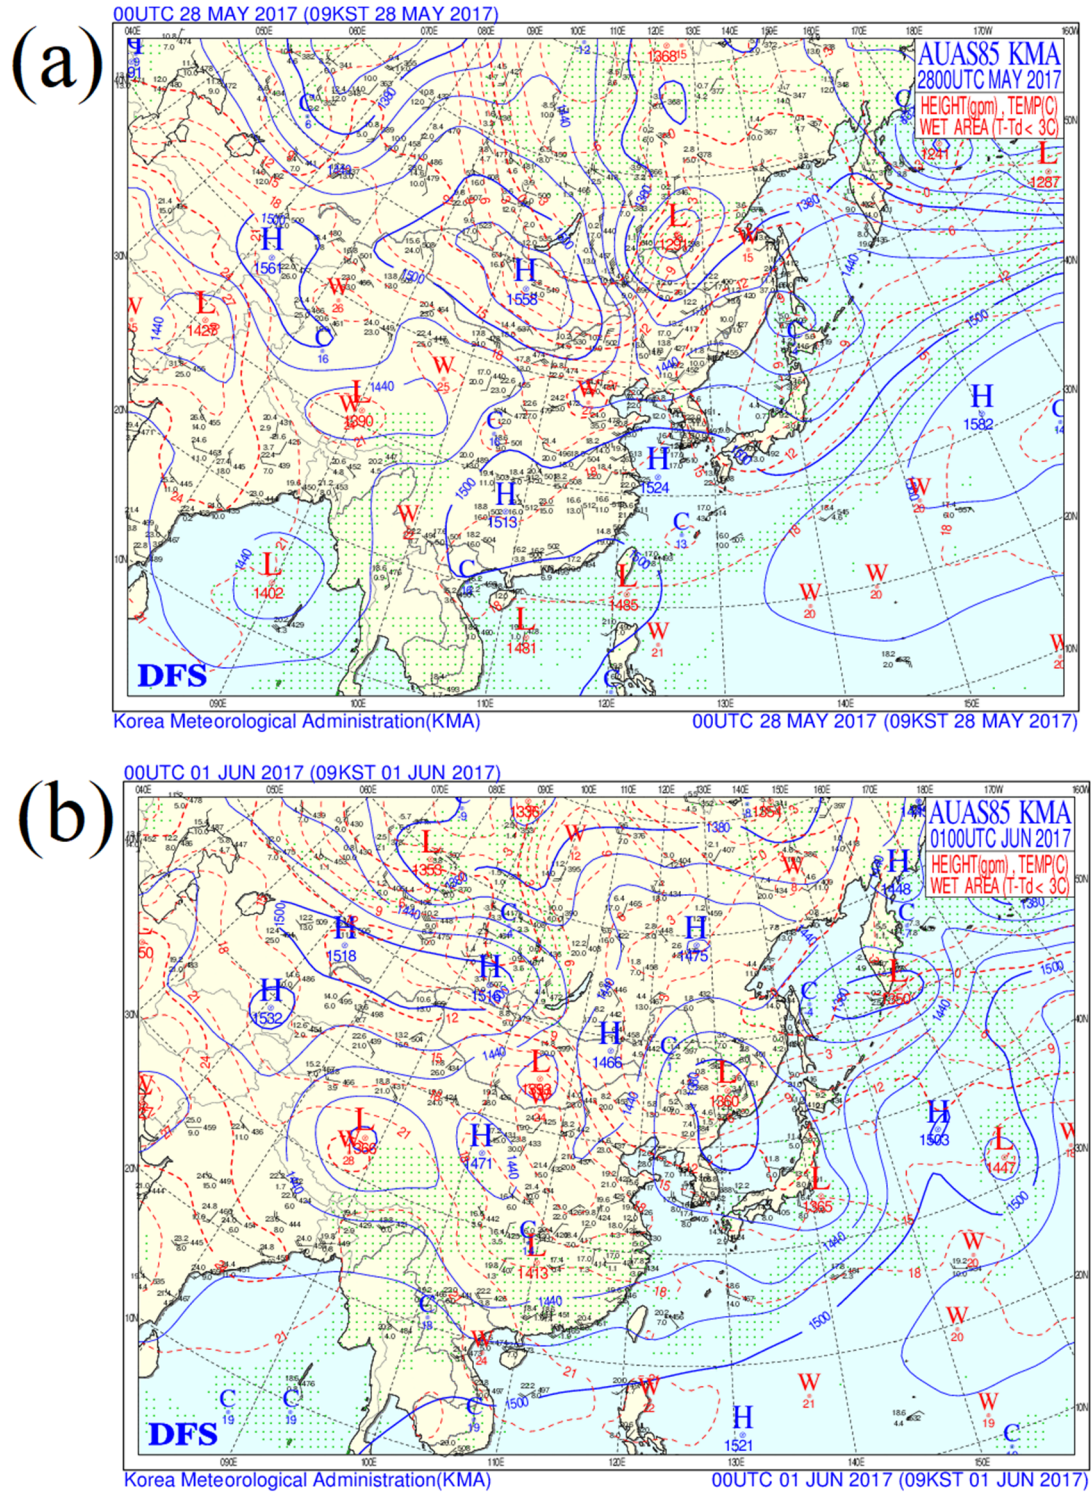

**Figure S1.** Weather charts at the 850 hPa layer over the East Asia at 00:00 UTC on (a) 28 May and

(b) 1 June in 2017, indicating the weather patterns of under high pressure and uniform pressure field, respectively.

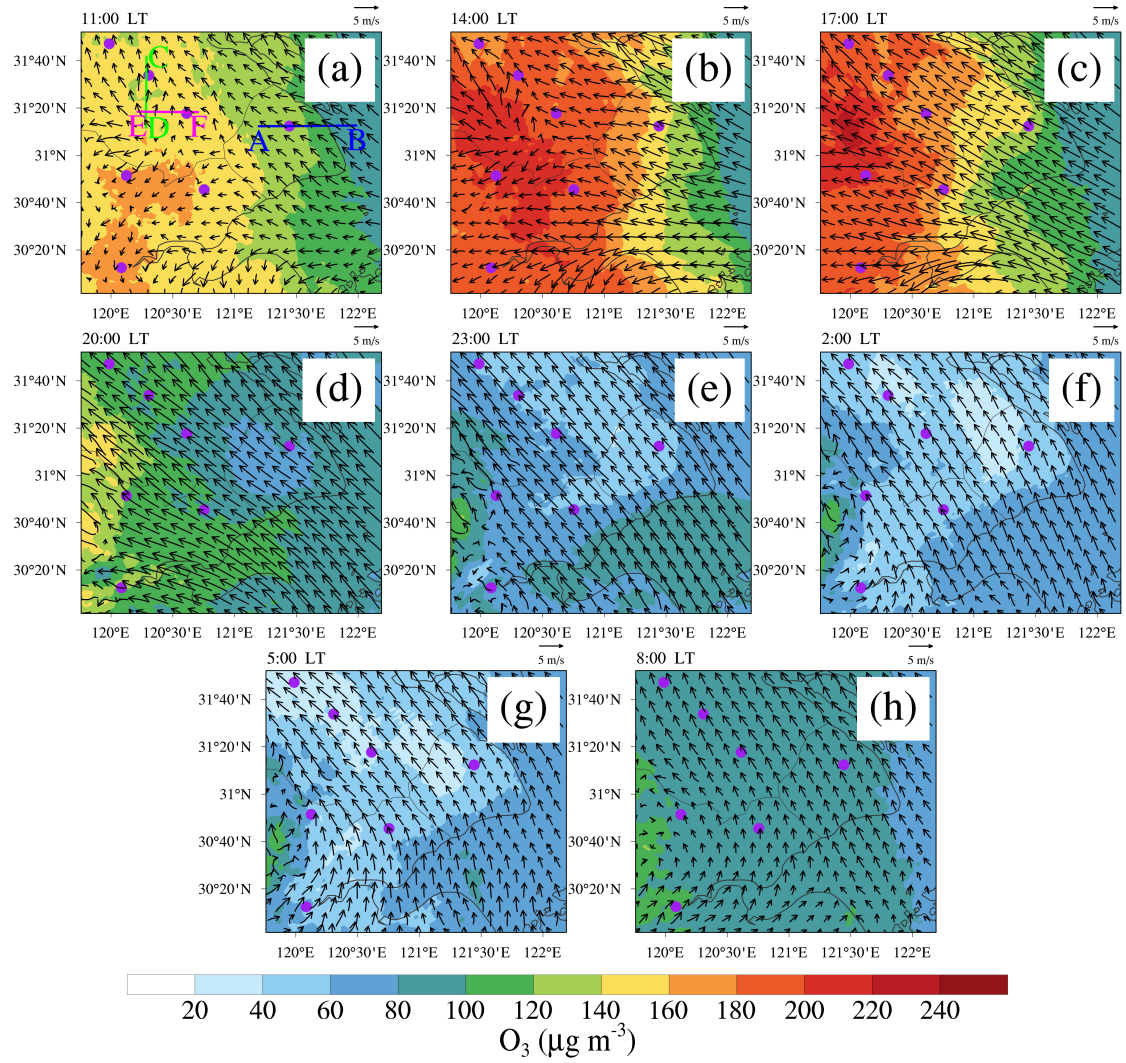

**Figure S2.** Same as Figure 7, but for the USGS\_noAH simulation.

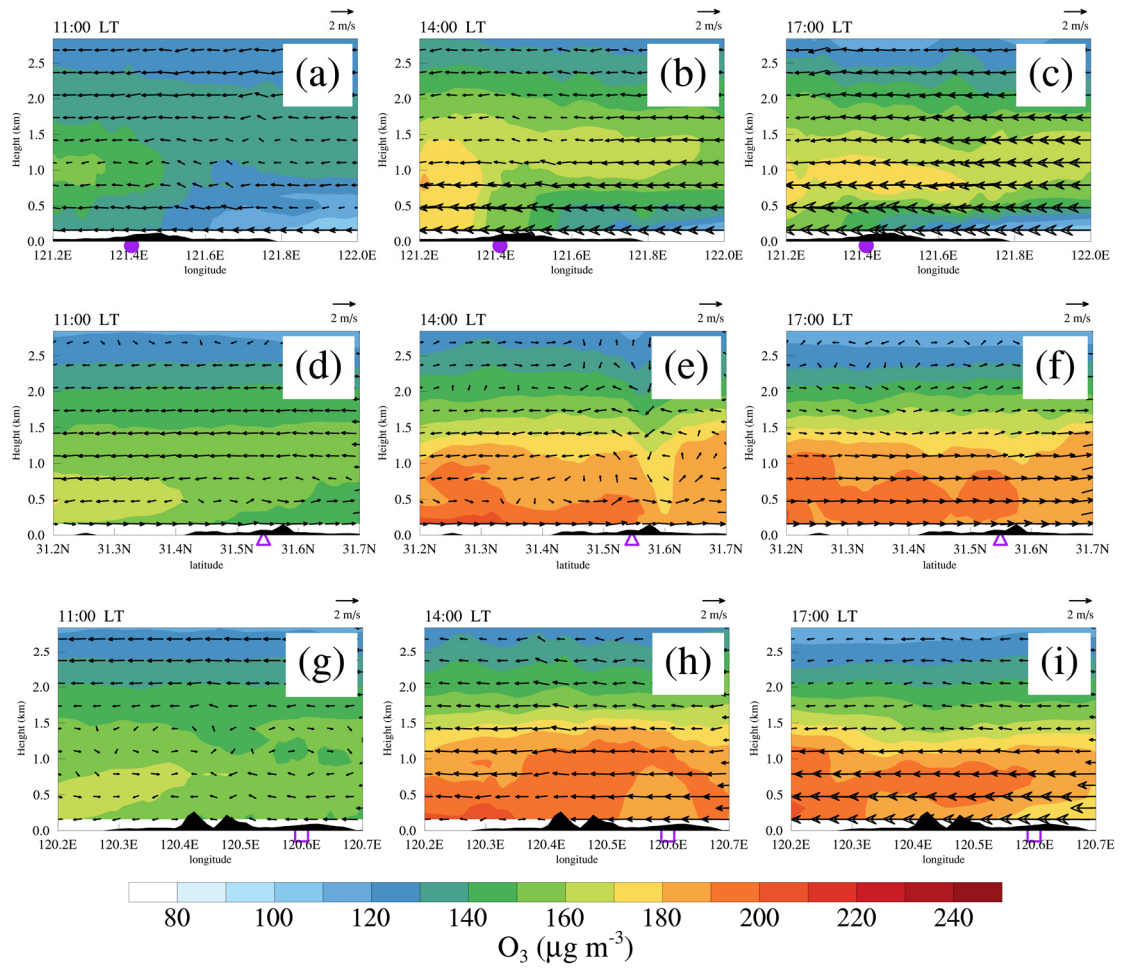

**Figure S3.** Same as Figure 9, but for the USGS\_noAH simulation.



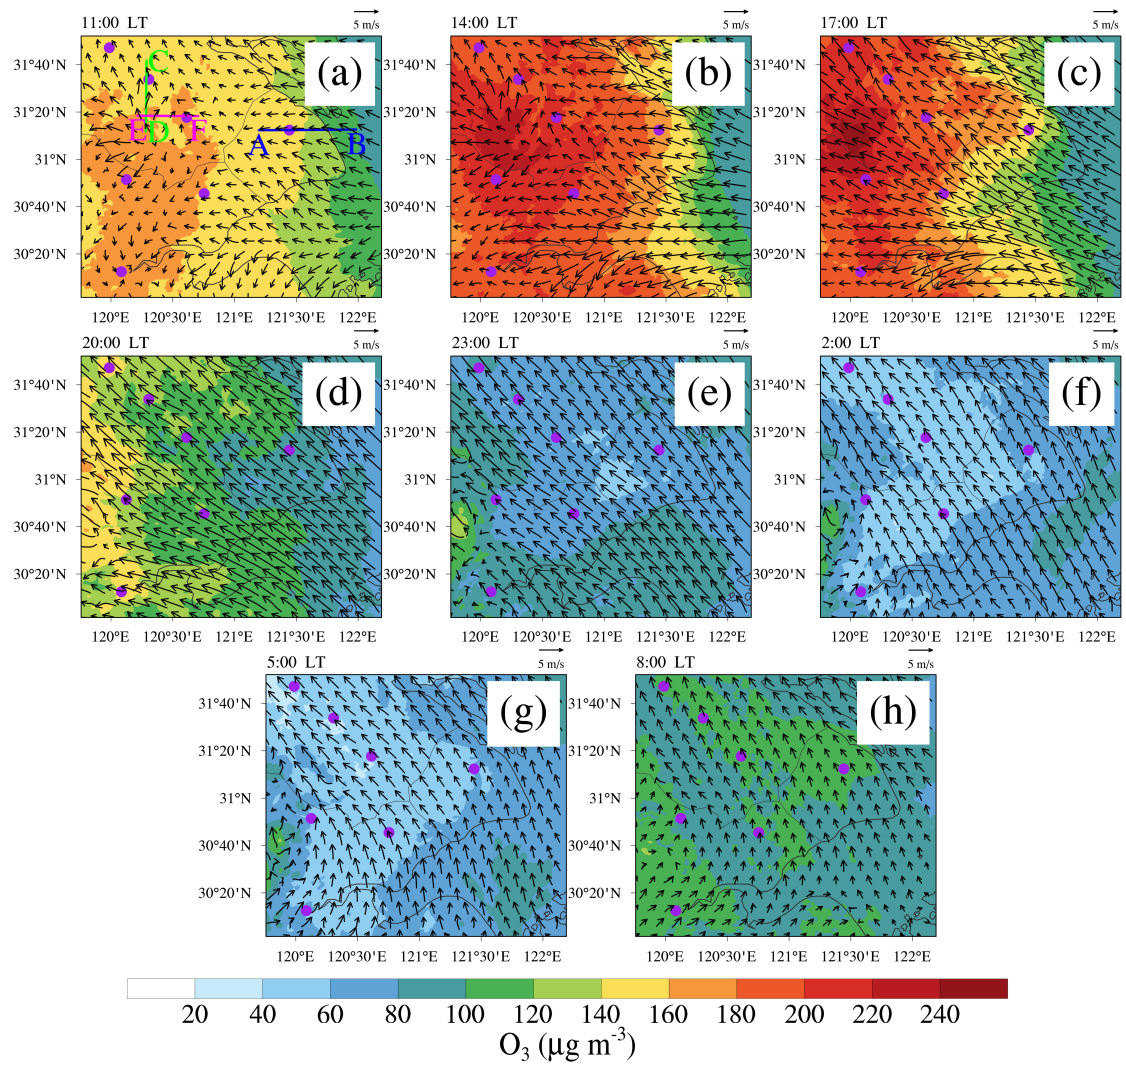

**Figure S4.** Same as Figure 7, but for the MODIS\_withAH simulation.

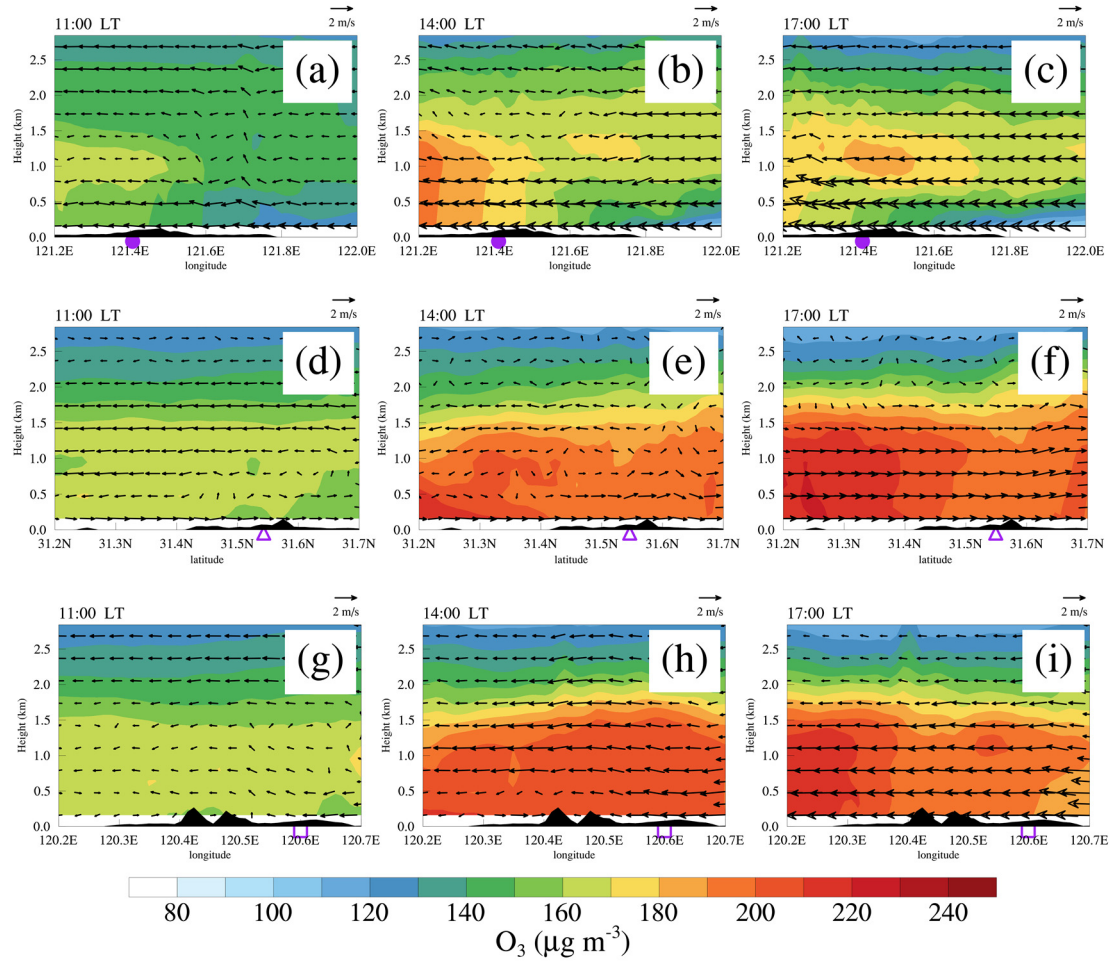

**Figure S5.** Same as Figure 9, but for the MODIS\_withAH simulation.
